# Supplementary material
Source: Springer Nature journal article supplement (https://www.springermedizin.de/resource/supplementary/12913_2010_1532_MOESM1_ESM.pdf/9528632)
Supplement: MOESM1 [file 9528632]

Stratification

FOR EACH REGION PARTICIPATING TO THE TRIAL

Selection of  
pairs of wards

WARD # 1  
WARD # 2

OTHER PAIRS  
OF WARDS

randomisation

EXP  
WARD

CTR  
WARD

MATCHED TIMING
